# Supplementary material for: Green synthesis of zinc oxide nanostructures and investigation of their photocatalytic and bactericidal applications
Source: Royal Society of Chemistry journal article supplement (doi:10.1039/c9ra07630a), 2019-01-01
Supplement: c9ra07630a1.pdf [file c9ra07630a1.pdf]

## Synthesis of Zinc Oxide Nanostructures and Investigation of their Photocatalytic and Bactericidal Applications

Mebrahtu Hagos Kahsay <sup>\*a</sup>, Aschalew Tadessb <sup>b</sup>, Dharamasoth RamaDevi <sup>c</sup>, Neway Belachew <sup>d</sup>,  
and K. Basavaiah <sup>e</sup>

<sup>a</sup>Department of Chemistry, Woldia University, Woldia, P.O.BOX 400, Ethiopia.

<sup>b</sup>Department of Applied Chemistry, Adama Science and Technology University, Adama, P.O.BOX 1888,  
Ethiopia.

<sup>c</sup>AU College of Pharmaceutical Sciences, Andhra University, Visakhapatnam, 530003, India.

<sup>d</sup>Department of Chemistry, Debre Berhan University, Debre Berhan, P.O.BOX 445, Ethiopia.

<sup>e</sup>Department of Inorganic & Analytical Chemistry, Andhra University, Visakhapatnam, 530003, India.

**\*Corresponding author.**

E-mail address: [hagosmebrahtu@gmail.com](mailto:hagosmebrahtu@gmail.com) (Kahsay, Mebrahtu Hagos)

### LIST OF TABLES

**Table 1** Preliminary phytochemical investigation of aqueous leaf extract of *Dolichos lablab* L.

| S. No. | Test                                                 | Chemical Constituents  | Result |
|--------|------------------------------------------------------|------------------------|--------|
| 1      | Mayer's test                                         | Alkaloid               | +      |
| 2      | FeCl <sub>3</sub> solution                           | Phenol                 | +      |
| 3      | NaOH                                                 | Flavonoid              | +      |
| 4      | Fehling solution                                     | Carbohydrate           | -      |
| 5      | Conc. HNO <sub>3</sub>                               | Amino acid and protein | +      |
| 6      | Methanol, chloroform, H <sub>2</sub> SO <sub>4</sub> | Terpenoid              | +      |
| 7      | Shake with water                                     | Saponin                | +      |

Where, (+) indicates presence and (-) indicates absence

**Table 2 Structure and geometric parameters of ZnO nanostructures**

| <b>2θ (degree)</b> | <b>FWHM (β)</b> | <b>d-spacing (Å)</b> | <b>Cos θ</b> | <b>Crystallite size (nm)</b> |
|--------------------|-----------------|----------------------|--------------|------------------------------|
| 8.3932             | 1.3056          | 10.52625             | 0.99732      | 6.38                         |
| 31.8365            | 0.4080          | 2.80859              | 0.96165      | 21.16                        |
| 34.5150            | 0.2448          | 2.59651              | 0.95498      | 35.51                        |
| 36.3340            | 0.1224          | 2.47059              | 0.95015      | 71.38                        |
| 47.6293            | 0.5712          | 1.90772              | 0.91486      | 15.88                        |
| 56.6423            | 0.0816          | 1.62369              | 0.88030      | 115.55                       |
| 62.9124            | 0.2448          | 1.47610              | 0.85304      | 39.75                        |
| 66.5366            | 0.5712          | 1.40422              | 0.83611      | 17.38                        |
| 68.0506            | 0.4488          | 1.37662              | 0.82879      | 22.31                        |
| 69.1192            | 0.6528          | 1.35792              | 0.82354      | 15.44                        |
| <b>Average</b>     |                 |                      |              | <b>36.07</b>                 |

**Table 3 Zone of inhibition of ZnO nanostructures against pathogens**

| <b>S. No.</b> | <b>Pathogens</b>                 | <b>Concentration of ZnO nanostructures (mg/ml)</b> |            |             | <b>Standard (Ciprofloxacin)</b> | <b>Control (DMSO)</b> |
|---------------|----------------------------------|----------------------------------------------------|------------|-------------|---------------------------------|-----------------------|
|               |                                  | <b>2.5</b>                                         | <b>5.0</b> | <b>10.0</b> | <b>5 µg/ml</b>                  |                       |
| 1             | <i>Bacillus pumilis</i>          | 12 mm                                              | 18 mm      | 15 mm       | 40 mm                           | NA                    |
| 2             | <i>Sphingonomas paucimobilis</i> | 15 mm                                              | 20 mm      | 15 mm       | 40 mm                           | NA                    |

Where, DMSO is Dimethyl sulfoxide and NA is Not available
